# Supplementary material
Source: PubMed Central journal article supplement (PMC3072033)
Supplement: NIHMS252502-supplement-1_si_001.pdf [file NIHMS252502-supplement-1_si_001.pdf]

## **Supporting Material**

### **Computational Determination of Binding Structures and Free Energies of Phosphodiesterase-2 with Benzo[1,4]diazepin-2-one Derivatives**

Bo Yang,<sup>1,2</sup> Adel Hamza,<sup>2</sup> Guangju Chen,<sup>1</sup> Yan Wang,<sup>1</sup> and Chang-Guo Zhan<sup>2</sup>

<sup>1</sup>Department of Chemistry, College of Chemistry, Beijing Normal University, Beijing 100875, P. R. China and <sup>2</sup>Department of Pharmaceutical Sciences, College of Pharmacy, University of Kentucky, 789 South Limestone Street, Lexington, Kentucky 40536

#### **Correspondence:**

Chang-Guo Zhan, Ph.D.

Professor

Department of Pharmaceutical Sciences

College of Pharmacy

University of Kentucky

789 South Limestone Street

Lexington, KY 40536

TEL: 859-323-3943

FAX: 859-323-3575

E-mail: [zhan@uky.edu](mailto:zhan@uky.edu)

**Supporting Information Available:** Figures and Table for the more detailed information about the simulated PDE2A-inhibitor binding structures and the results from the binding energy decomposition. This material is available free of charge via the Internet at <http://pubs.acs.org>.

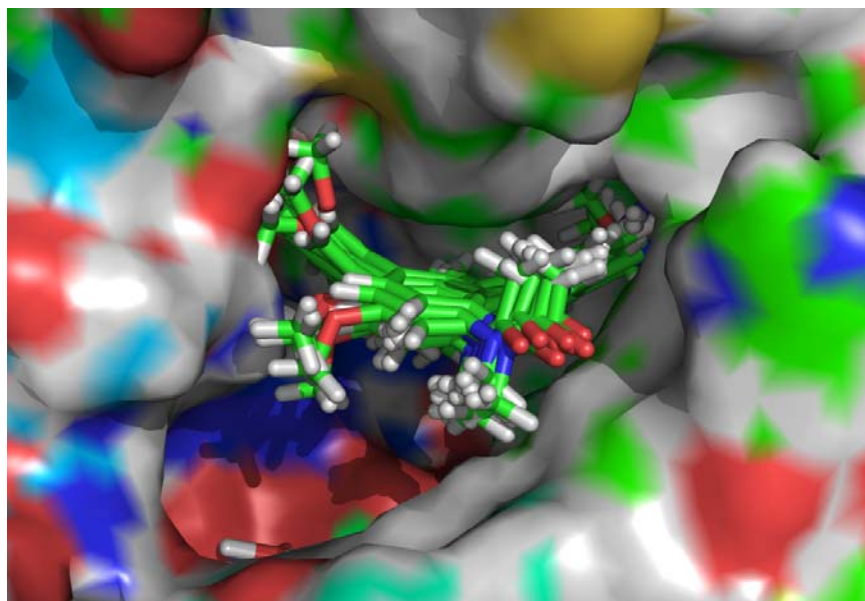

Figure S1. Superposition of the docked binding structures for the 11 ligands in the PDE2A activity site.

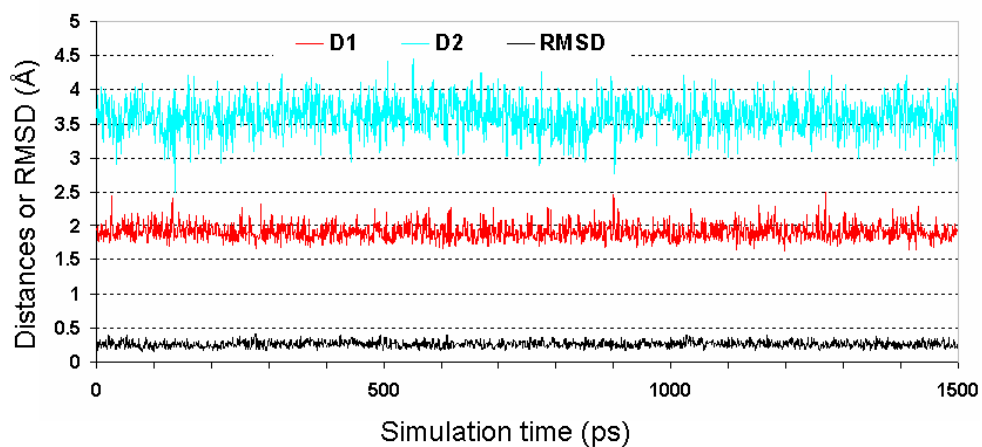

Figure S2. Plots of MD-simulated internuclear distances and RMSD for atomic positions of the ligand *versus* the simulation time for PDE2A binding with compound **2**. Trace D1 represents the internuclear distance between the oxygen of the methoxy group ( $R^4$ ) and a hydrogen atom of the amine group in Gln859 side chain. Trace D2 refers to the internuclear distance between the oxygen atom of a methoxy group in  $R^3$  and a hydrogen atom of the amine group in Asn704 side chain.

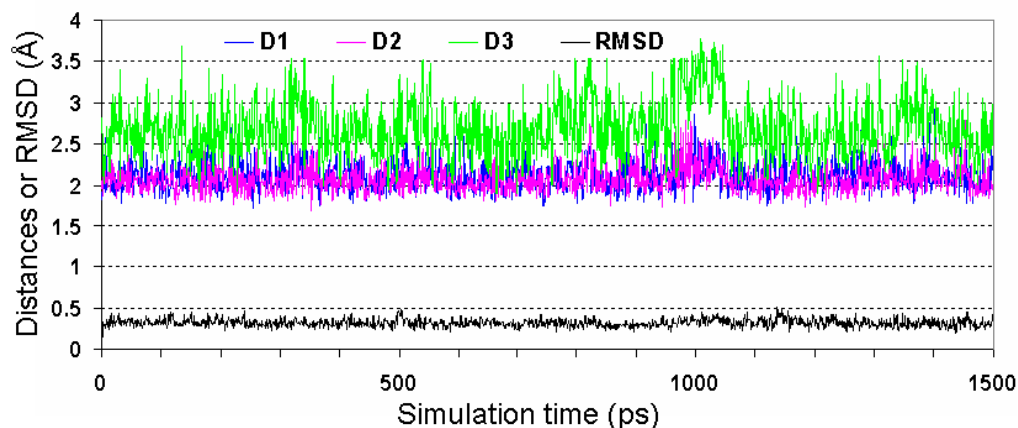

Figure S3. Plots of MD-simulated internuclear distances and RMSD for atomic positions of the ligand *versus* the simulation time for PDE2A binding with compound **4**. Traces D1 and D2 represent the H $\cdots$ O distances associated with a pair of hydrogen bonds (N-H $\cdots$ O) between the amide group in R<sup>4</sup> and the amide group of Gln859 side chain. Trace D3 refers to the internuclear distance between the oxygen of a methoxy group in R<sup>3</sup> and a hydrogen atom of the amine group in Asn704 side chain.

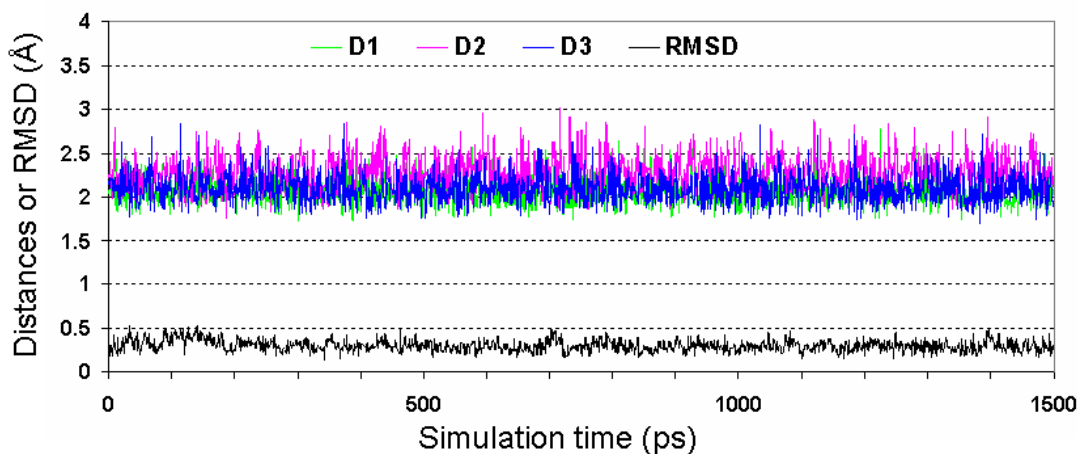

Figure S4. Plots of MD-simulated internuclear distances and RMSD for atomic positions of the ligand *versus* the simulation time for PDE2A binding with compound **5**. Traces D1 and D2 represent the H $\cdots$ O distances associated with a pair of hydrogen bonds (N-H $\cdots$ O) between the amide group in R<sup>4</sup> and the amide group of Gln859 side chain. Trace D3 refers to the internuclear distance between the oxygen of the methoxy group (R<sup>2</sup>) and a hydrogen atom of the amine group in Asn704 side chain.

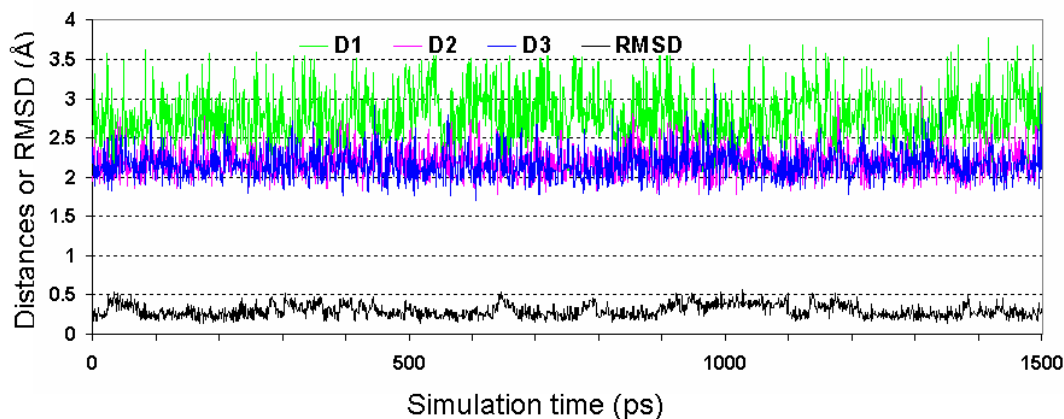

Figure S5. Plots of MD-simulated internuclear distances and RMSD for atomic positions of the ligand *versus* the simulation time for PDE2A binding with compound **6**. Traces D1 and D2 represent the H $\cdots$ O distances associated with a pair of hydrogen bonds (N-H $\cdots$ O) between the amide group in R<sup>4</sup> and the amide group of Gln859 side chain. Trace D3 refers to the distance between the oxygen of the ligand methoxy group in R<sup>2</sup> and a hydrogen atom of the amine group in Asn704 side chain.

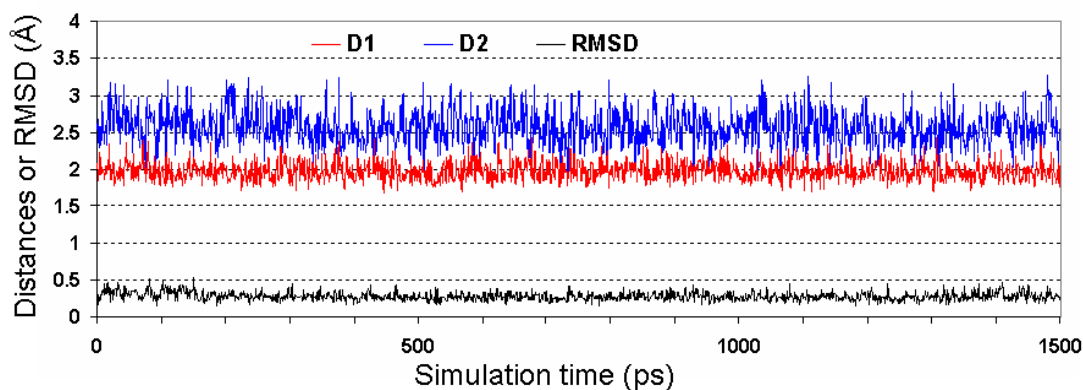

Figure S6. Plots of MD-simulated internuclear distances and RMSD for atomic positions of the ligand *versus* the simulation time for PDE2A binding with compound **7**. Trace D1 represents the hydrogen bond distances between the oxygen atom of the ligand CH<sub>2</sub>OCH<sub>3</sub> group at the R<sup>4</sup> position and the hydrogen in amide side chain of Gln859 residue. Trace D2 refers to the distance between the oxygen of the methoxy group (R<sup>2</sup>) position and a hydrogen atom of the amine group in Asn704 side chain.

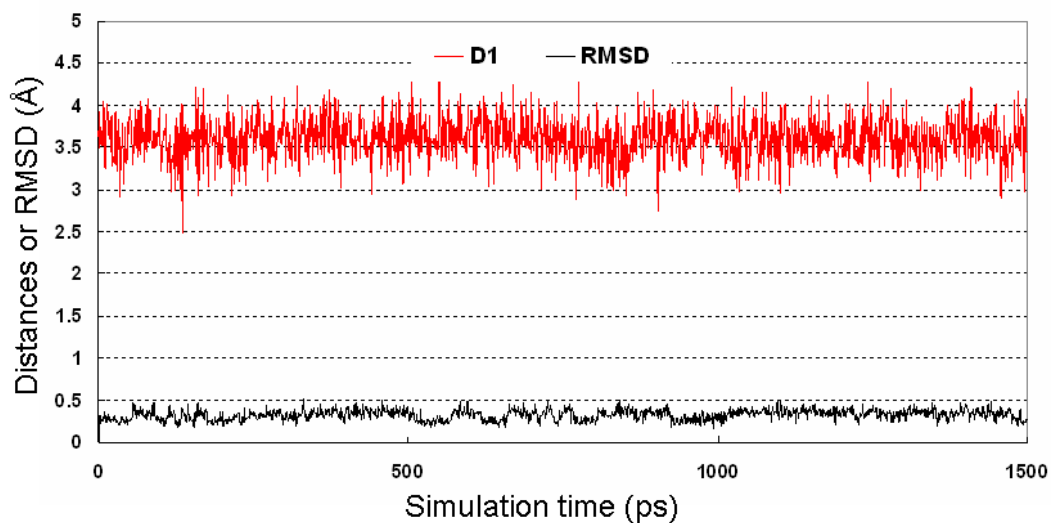

Figure S7. Plots of MD-simulated internuclear distances and RMSD for atomic positions of the ligand *versus* the simulation time for PDE2A binding with compound **8**. Trace D1 represents the internuclear distance between the oxygen of a methoxy group in R<sup>3</sup> and a hydrogen atom of the amine group in Asn704 side chain.

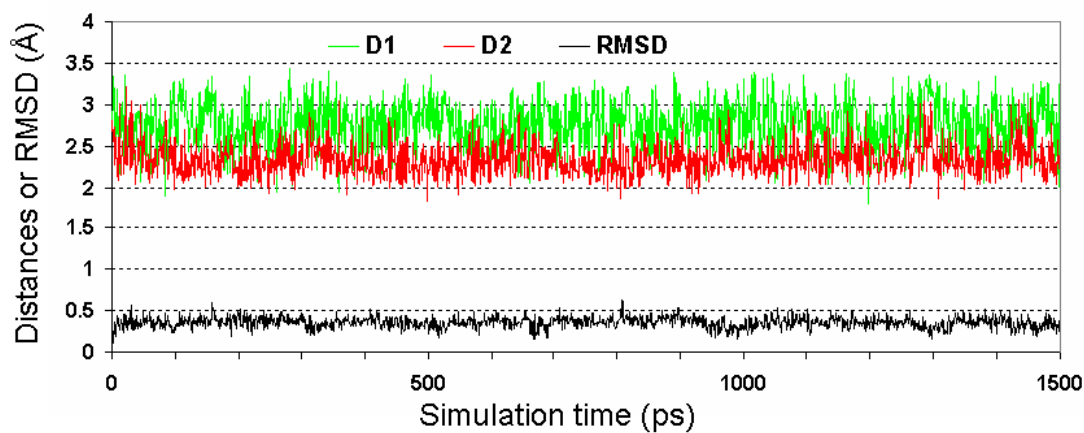

Figure S8. Plots of MD-simulated internuclear distances and RMSD for atomic positions of the ligand *versus* the simulation time for PDE2A binding with compound **9**. Trace D1 represents the hydrogen bond distances between the nitrogen of the ligand cyano group (R<sup>4</sup>) and the hydrogen of amide group in Gln859 side chain. Trace D2 refers to the internuclear distance between the oxygen of a methoxy group in R<sup>3</sup> and a hydrogen atom of the amine group in Asn704 side chain.

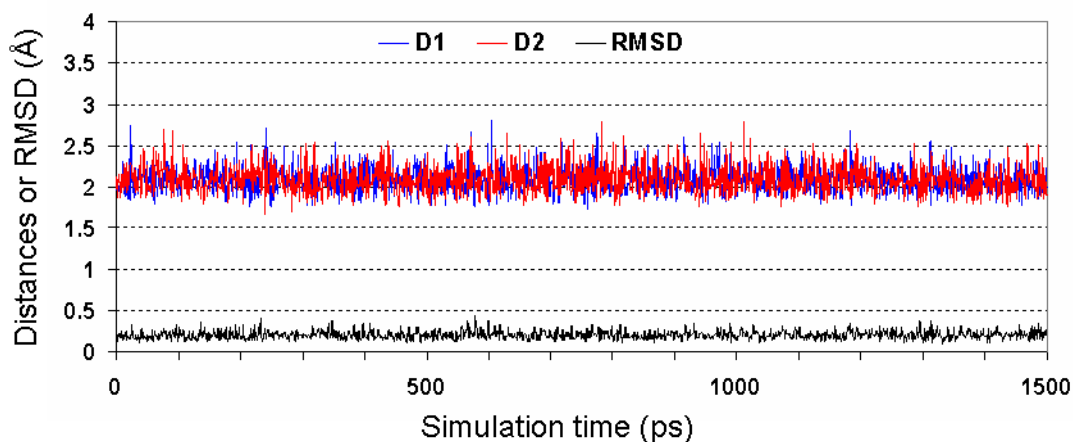

Figure S9. Plots of MD-simulated internuclear distances and RMSD for atomic positions of the ligand *versus* the simulation time for PDE2A binding with compound **10**. Traces D1 and D2 represent the H $\cdots$ O distances associated with a pair of hydrogen bonds (N-H $\cdots$ O) between the amide group in R<sup>4</sup> and the amide group of Gln859 side chain.

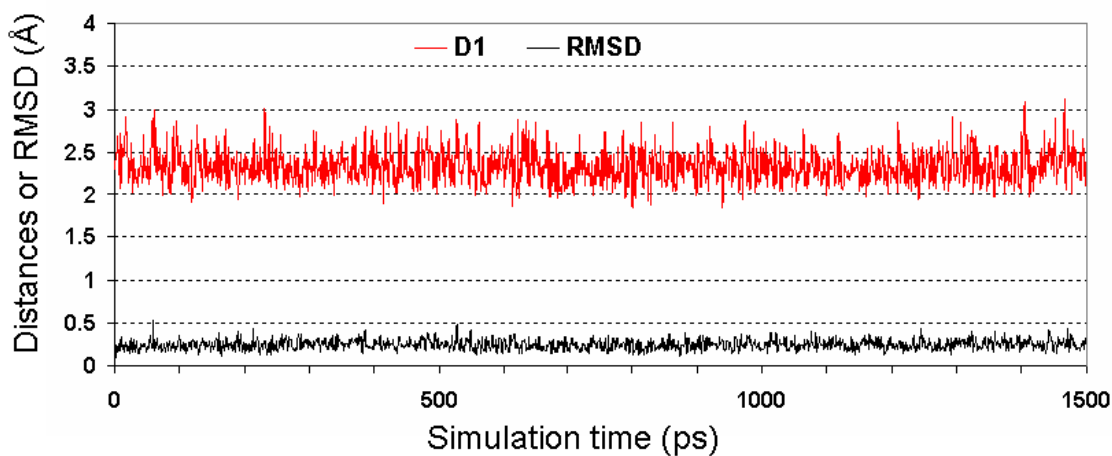

Figure S10. Plots of MD-simulated internuclear distances and RMSD for atomic positions of the ligand *versus* the simulation time for PDE2A binding with compound **11**. Trace D1 represents the hydrogen bond distances between the nitrogen of the ligand cyano group (R<sup>4</sup>) and a hydrogen atom of the amine group in Gln859 side chain.

Table S1. Binding free energy contributions of key binding-site residues calculated from the binding energy decomposition for five representative compounds. All energy values are in kcal/mol.

|        | Compound 1 |       |       |       |                                        | Compound 2 |       |       |       |                                        |
|--------|------------|-------|-------|-------|----------------------------------------|------------|-------|-------|-------|----------------------------------------|
|        | vdW        | ele   | MM    | GB    | $\Delta G_{\text{bind}}^{\text{GBSA}}$ | vdW        | ele   | MM    | GB    | $\Delta G_{\text{bind}}^{\text{GBSA}}$ |
| Tyr655 | -0.96      | -0.13 | -1.09 | 0.18  | -0.91                                  | -1.08      | -0.06 | -1.14 | 0.07  | -1.07                                  |
| Hid656 | -1.27      | -0.31 | -1.57 | 0.28  | -1.29                                  | -0.99      | 0.40  | -0.58 | -0.35 | -0.93                                  |
| Asn704 | -1.28      | -3.49 | -4.78 | 2.86  | -1.91                                  | -1.15      | -0.73 | -1.88 | 1.67  | -0.22                                  |
| Leu770 | -0.51      | 0.24  | -0.27 | -0.26 | -0.53                                  | -0.52      | 0.07  | -0.45 | -0.10 | -0.55                                  |
| Leu809 | -0.80      | 0.15  | -0.65 | -0.23 | -0.89                                  | -0.77      | 0.13  | -0.64 | -0.22 | -0.85                                  |
| Ile826 | -2.54      | -0.02 | -2.56 | -0.12 | -2.68                                  | -2.56      | -0.09 | -2.65 | -0.02 | -2.67                                  |
| Glu829 | -1.27      | -2.66 | -3.93 | 3.48  | -0.45                                  | -1.30      | -3.68 | -4.98 | 4.44  | -0.54                                  |
| Phe830 | -4.74      | 0.02  | -4.72 | 0.56  | -4.16                                  | -4.74      | 0.14  | -4.60 | 0.56  | -4.04                                  |
| Leu858 | -0.72      | 0.09  | -0.63 | -0.15 | -0.78                                  | -0.72      | 0.14  | -0.58 | -0.18 | -0.77                                  |
| Gln859 | -0.62      | -2.76 | -3.38 | 1.24  | -2.14                                  | -0.65      | -3.03 | -3.68 | 1.38  | -2.30                                  |
| Phe862 | -2.54      | 0.15  | -2.39 | 0.11  | -2.28                                  | -2.60      | 0.15  | -2.44 | 0.09  | -2.36                                  |
| Ile866 | -1.50      | -0.21 | -1.70 | -0.07 | -1.78                                  | -1.53      | -0.24 | -1.77 | -0.06 | -1.83                                  |
|        | Compound 3 |       |       |       |                                        | Compound 4 |       |       |       |                                        |
|        | vdW        | ele   | MM    | GB    | $\Delta G_{\text{bind}}^{\text{GBSA}}$ | vdW        | ele   | MM    | GB    | $\Delta G_{\text{bind}}^{\text{GBSA}}$ |
| Tyr655 | -0.61      | 0.03  | -0.58 | -0.02 | -0.6                                   | -0.73      | 0.14  | -0.59 | -0.06 | -0.65                                  |
| Hid656 | -0.92      | 0.12  | -0.8  | 0.06  | -0.74                                  | -0.92      | 0.13  | -0.79 | -0.13 | -0.91                                  |
| Asn704 | -1.52      | -2.96 | -4.49 | 2.27  | -2.22                                  | -0.65      | -1.7  | -2.36 | 1.44  | -0.91                                  |
| Leu770 | -0.64      | 0.25  | -0.38 | -0.24 | -0.62                                  | -0.58      | 0.1   | -0.48 | -0.1  | -0.58                                  |
| Leu809 | -0.75      | 0.07  | -0.69 | -0.13 | -0.81                                  | -0.94      | 0.07  | -0.87 | -0.15 | -1.02                                  |
| Ile826 | -1.16      | -0.16 | -1.32 | -0.14 | -1.45                                  | -1.49      | -0.42 | -1.91 | 0.05  | -1.85                                  |
| Glu829 | -0.9       | -1.55 | -2.45 | 2.39  | -0.06                                  | -0.98      | -2.27 | -3.24 | 3.17  | -0.07                                  |
| Phe830 | -4.33      | 0.07  | -4.27 | 0.18  | -4.09                                  | -4.32      | 0.14  | -4.18 | 0.48  | -3.7                                   |
| Leu858 | -0.7       | 0.03  | -0.68 | 0.04  | -0.64                                  | -0.65      | 0.06  | -0.58 | -0.01 | -0.6                                   |

|        |       |       |       |       |       |       |       |       |       |       |
|--------|-------|-------|-------|-------|-------|-------|-------|-------|-------|-------|
| Gln859 | -0.62 | -2.24 | -2.85 | 1.95  | -0.91 | -0.25 | -2.57 | -2.82 | 2.06  | -0.76 |
| Phe862 | -2.76 | 0.03  | -2.73 | -0.15 | -2.87 | -2.79 | 0     | -2.79 | -0.17 | -2.96 |
| Ile866 | -1.66 | -0.1  | -1.76 | -0.12 | -1.88 | -1.77 | -0.13 | -1.9  | -0.12 | -2.01 |

| Compound <b>10</b> |       |       |       |       |                                        |
|--------------------|-------|-------|-------|-------|----------------------------------------|
|                    | vdW   | ele   | MM    | GB    | $\Delta G_{\text{bind}}^{\text{GBSA}}$ |
| Tyr655             | -0.35 | 0.00  | -0.35 | 0.02  | -0.32                                  |
| Hid656             | -0.53 | -0.01 | -0.53 | -0.02 | -0.55                                  |
| Asn704             | -0.54 | -0.32 | -0.87 | 1.14  | 0.27                                   |
| Leu770             | -0.33 | 0.10  | -0.23 | -0.16 | -0.39                                  |
| Leu809             | -0.73 | 0.07  | -0.66 | -0.16 | -0.82                                  |
| Ile826             | -1.25 | -0.17 | -1.42 | -0.11 | -1.52                                  |
| Glu829             | -1.09 | -1.00 | -2.10 | 1.70  | -0.40                                  |
| Phe830             | -4.67 | -0.11 | -4.78 | 0.58  | -4.20                                  |
| Leu858             | -0.74 | 0.06  | -0.68 | 0.06  | -0.62                                  |
| Gln859             | -0.67 | -2.07 | -2.75 | 2.08  | -0.67                                  |
| Phe862             | -2.98 | -0.06 | -3.04 | -0.11 | -3.15                                  |
| Ile866             | -1.53 | -0.14 | -1.67 | -0.11 | -1.77                                  |
